# Supplementary material for: Advancing bio-filter materials for enhanced desalination in agricultural applications
Source: Royal Society of Chemistry journal article supplement (doi:10.1039/d4ra07538b), 2025-01-01
Supplement: d4ra07538b1.pdf [file d4ra07538b1.pdf]

Supporting information

**Synthesis of CMC polymer**

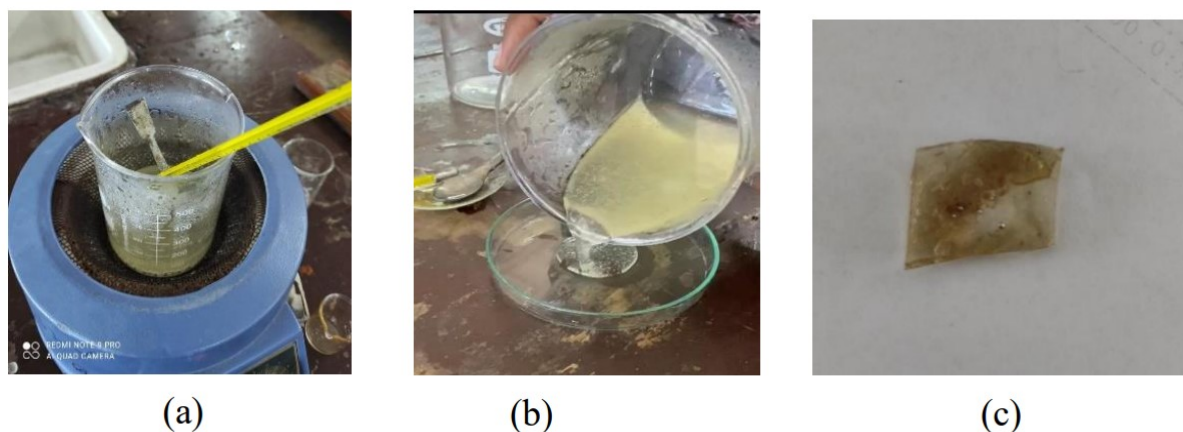

Figure S1: (a) Stirring process of polymer solution. (b) Pouring of final polymer solution into Petri dish. (c) Piece of final membrane (after being kept for 24 hours in oven at 60° C)

**Synthesis of Graphene Oxide**

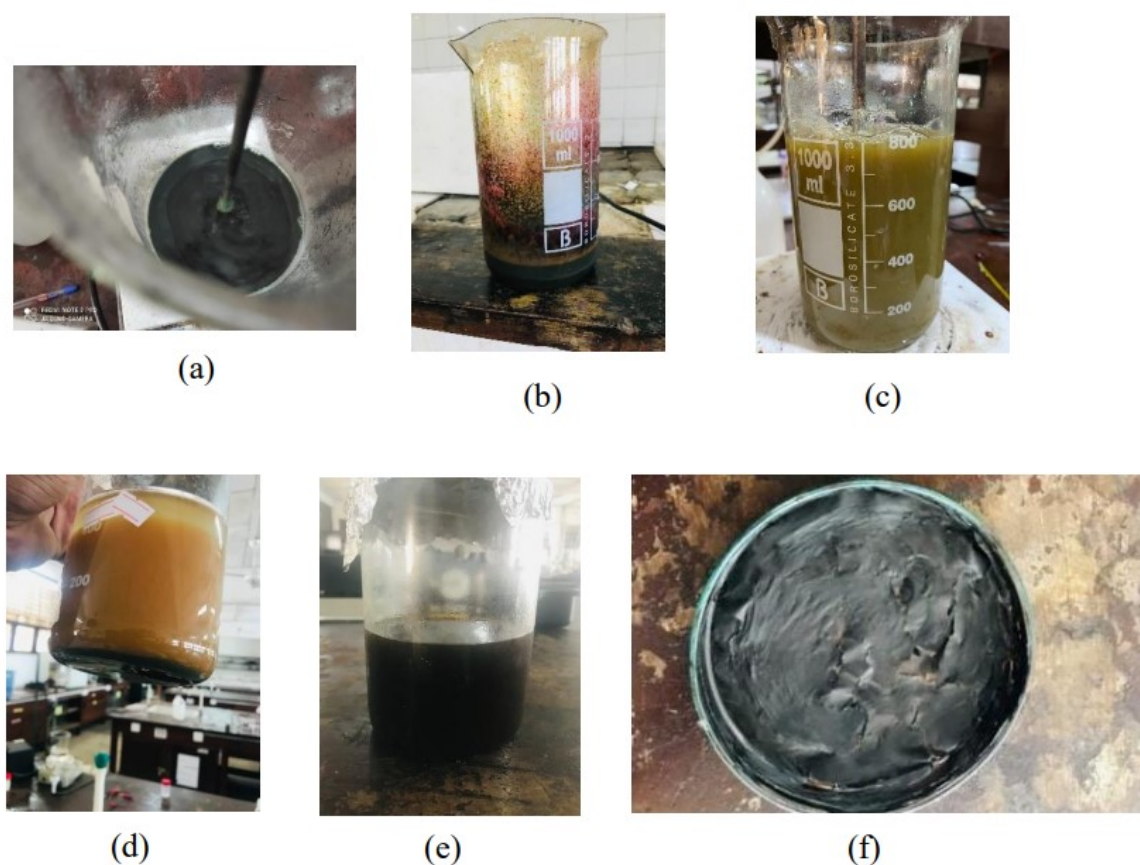

Figure S2: (a) Mechanical stirring process of potassium permanganate added dark green solution. (b) Dark purple colour solution after adding potassium permanganate. (c) The yellowish gold colour solution after adding Hydrogen peroxide. (d) Yellowish colour solution after being kept in the water for 24 hours. (e) graphene oxide stock solution after the washing process. (f) Graphene oxide thin films after being kept the stock solution in an oven at 80°C for 2 hours

### Synthesis of CMC/GO/Aloe vera composite

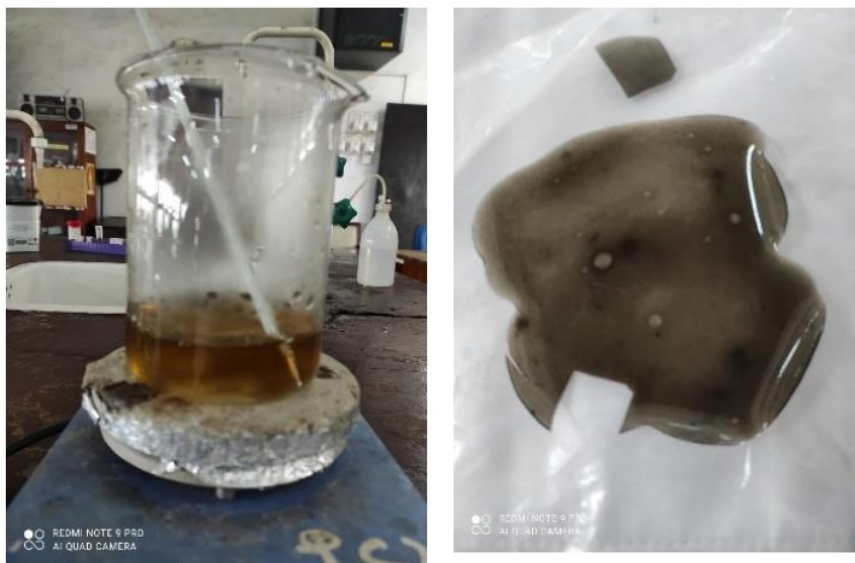

(a)

(b)

Figure S3: (a) Heating GO / Aloe vera /distilled water mixture up to 80° C (b)Synthesized CMC/GO/Aloe vera composite at 60 °C

**Table S1: Water uptake calculation of differently aged banana leaves**

| Age of banana leaf | Trial number | Initial weight<br>$\pm 0.0005 \text{ g}$ | Average initial weight<br>$\pm 0.0005 \text{ g}$ | Final weight<br>$\pm 0.0005 \text{ g}$ | Weight difference<br>$\pm 0.0005 \text{ g}$ | Average weight difference<br>$\pm 0.0005 \text{ g}$ |
|--------------------|--------------|------------------------------------------|--------------------------------------------------|----------------------------------------|---------------------------------------------|-----------------------------------------------------|
| Day 1              | 1            | 0.0557                                   | 0.0559                                           | 0.0875                                 | 0.0318                                      | 0.0322                                              |
|                    | 2            | 0.0560                                   |                                                  | 0.0886                                 | 0.0326                                      |                                                     |
| Day 7              | 1            | 0.0476                                   | 0.0474                                           | 0.0896                                 | 0.0420                                      | 0.0476                                              |
|                    | 2            | 0.0472                                   |                                                  | 0.1004                                 | 0.0532                                      |                                                     |
| Day 14             | 1            | 0.0343                                   | 0.0346                                           | 0.1407                                 | 0.1064                                      | 0.1028                                              |
|                    | 2            | 0.0349                                   |                                                  | 0.1341                                 | 0.0992                                      |                                                     |
| Day 21             | 1            | 0.0249                                   | 0.0250                                           | 0.1101                                 | 0.0852                                      | 0.0846                                              |
|                    | 2            | 0.0250                                   |                                                  | 0.1090                                 | 0.0840                                      |                                                     |
| Day 28             | 1            | 0.0256                                   | 0.0253                                           | 0.0840                                 | 0.0584                                      | 0.0586                                              |
|                    | 2            | 0.0250                                   |                                                  | 0.0837                                 | 0.0587                                      |                                                     |

**Table S2: Calculation of desalination percentages for different composites**

| Type of composite          | Trial number | Initial conductivity<br>$\pm 0.05 \text{ mS cm}^{-1}$ | Final conductivity<br>(After 30 min.)<br>$\pm 0.05 \text{ mS cm}^{-1}$ | Conductivity difference<br>$\pm 0.05 \text{ mS cm}^{-1}$ | Desalinated percentage (%) |
|----------------------------|--------------|-------------------------------------------------------|------------------------------------------------------------------------|----------------------------------------------------------|----------------------------|
| CMC                        | 1            | 40.39                                                 | 23.76                                                                  | 16.63                                                    | 41.18                      |
|                            | 2            | 39.96                                                 | 24.51                                                                  | 15.45                                                    | 38.67                      |
| CMC/Aloe vera              | 1            | 40.18                                                 | 21.03                                                                  | 19.15                                                    | 47.66                      |
|                            | 2            | 39.17                                                 | 19.63                                                                  | 19.54                                                    | 49.89                      |
| CMC/GO                     | 1            | 41.66                                                 | 15.98                                                                  | 25.68                                                    | 61.63                      |
|                            | 2            | 40.54                                                 | 14.57                                                                  | 25.97                                                    | 64.06                      |
| CMC/GO (50%)/<br>Aloe vera | 1            | 40.52                                                 | 10.12                                                                  | 30.40                                                    | 75.03                      |
|                            | 2            | 40.89                                                 | 10.93                                                                  | 29.96                                                    | 73.26                      |

**XRD Analysis of synthesized composite**

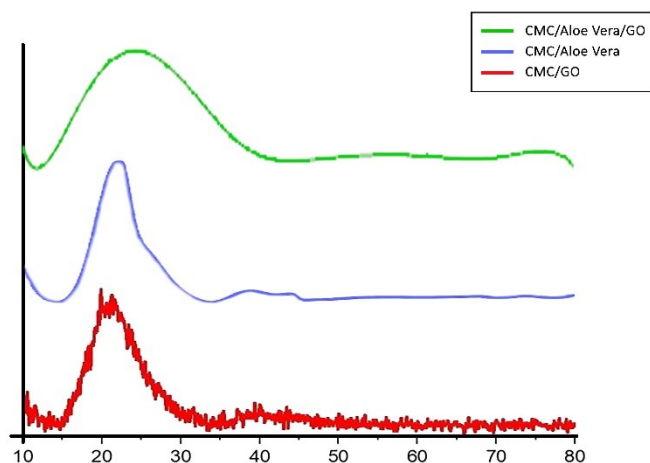

Figure S4: Merged XRD analysis of synthesized composites

**SEM Analysis of synthesized composite**

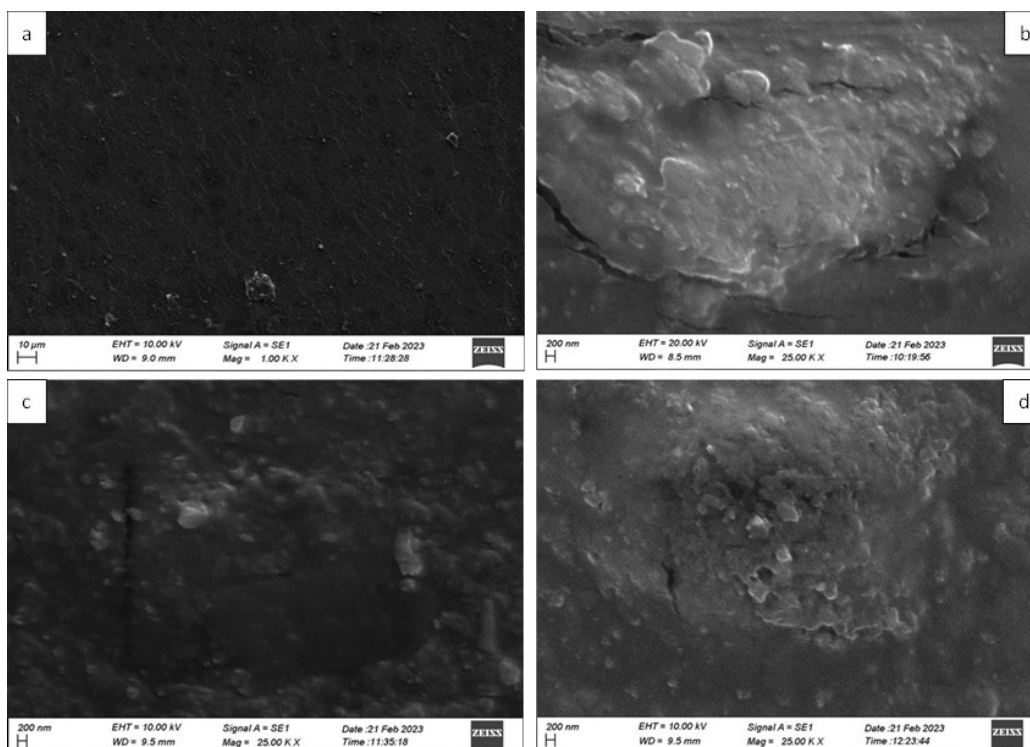

Figure S5: SEM analysis of synthesized composites (a)CMC (b)CMC/Aloe vera (c)CMC/GO (d)CMC/GO (50%)/Aloe vera
